# Supplementary material for: Sex Biased Gene Expression Profiling of Human Brains at Major Developmental Stages
Source: PubMed Central journal article supplement (PMC4754746; doi:10.1038/srep21181), 2016-02-16
Supplement: srep21181-s1.pdf [file srep21181-s1.pdf]

## **Supplementary Information**

### **Sex Biased Gene Expression Profiling of Human Brains at Major Developmental Stages**

Lei Shi<sup>1,2,3,4,§</sup>, Zhe Zhang<sup>1,2,3,§</sup> and Bing Su<sup>1,2,3\*</sup>

<sup>1</sup>Faculty of Life Science and Technology, Kunming University of Science and Technology, Kunming 650500, China;

<sup>2</sup>State Key Laboratory of Genetic Resources and Evolution, Kunming Institute of Zoology, Chinese Academy of Sciences, Kunming 650223, China;

<sup>3</sup>Yunnan Key Laboratory of Primate Biomedical Research, Kunming 650000, China.

<sup>4</sup> The Molecular & Behavioral Neuroscience Institute (MBNI), University of Michigan, 109 Zina Pitcher Place, Ann Arbor, MI 48109-2200, USA

**Figure S1. Venn diagrams of sex biased genes on Y chromosome at prenatal, early childhood, puberty and adulthood stages.**

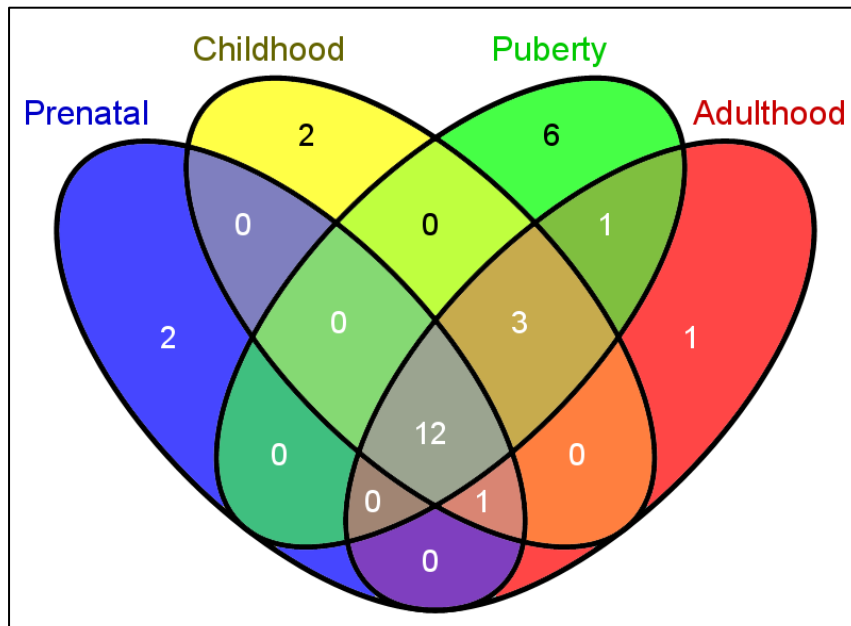

**Figure S2. IL33 expression in females (red) and males (blue) in the human brain regions at prenatal, early childhood, puberty and adulthood stages.**

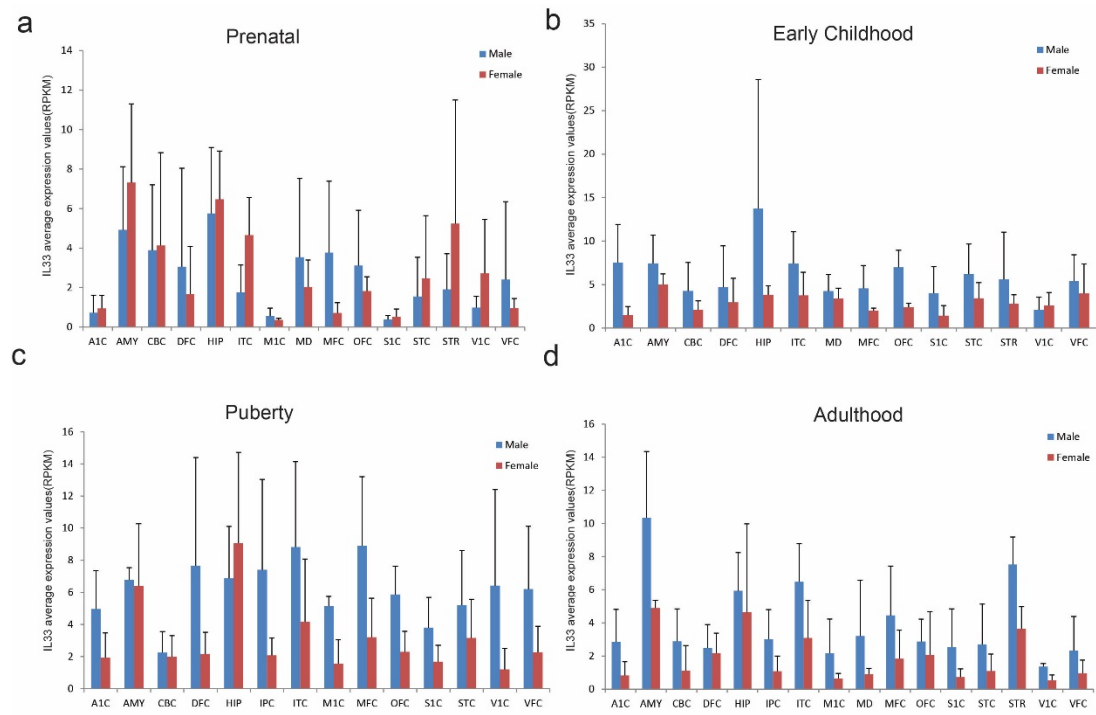

**Figure S3. Venn diagram of sex biased genes based on comparison between the gene list of this study (yellow pie) and the published dataset-HMG<sup>1</sup> (blue pie).**

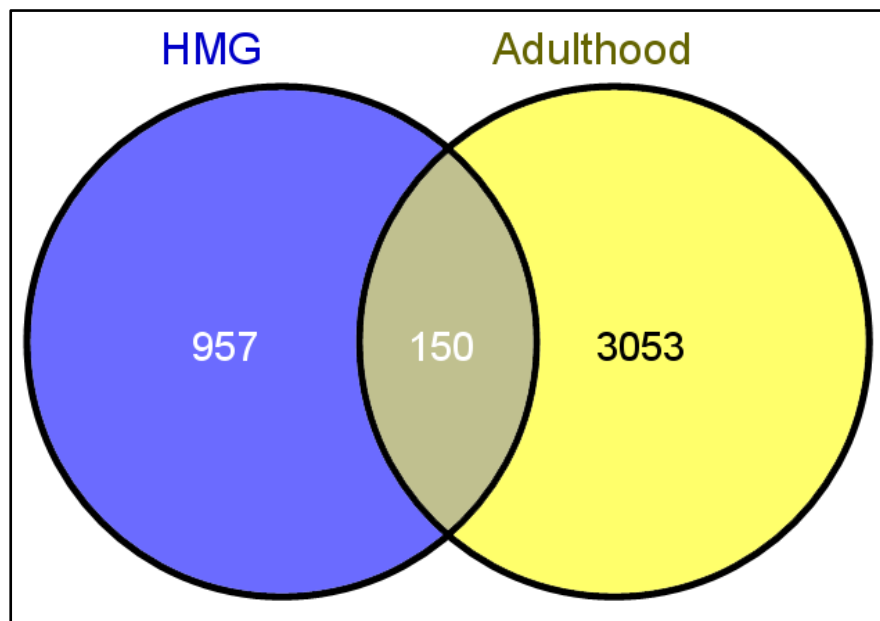

**References**

1. Xu, H. *et al.* Sex-biased methylome and transcriptome in human prefrontal cortex. *Hum Mol Genet* **23**, 1260-70 (2014).
